# Supplementary material
Source: HighWire-hosted journal article supplement (https://cmajopen.ca/highwire/filestream/80995/field_highwire_adjunct_files/2/open-2015-0086-original-submission.pdf)
Supplement: open-2015-0086-original-submission.pdf [file open-2015-0086-original-submission.pdf]

## Principles of Fatigue in Residency Education

Taryn S. Taylor MD, Christopher J. Watling MD PhD, Pim W. Teunissen MD PhD, Tim Dornan MD PhD, and Lorelei Lingard PhD

**Dr. Taylor** is resident Department of Obstetrics & Gynaecology, and research fellow Centre for Education Research & Innovation, Schulich School of Medicine & Dentistry, Western University, London, Ontario, Canada. Email: [ttaylor2010@meds.uwo.ca](mailto:ttaylor2010@meds.uwo.ca)

**Dr. Watling** is associate dean, Postgraduate Medical Education, Schulich School of Medicine & Dentistry, Western University, London, Ontario, Canada.

**Dr. Teunissen** is associate professor of medical education at Maastricht University, the Netherlands and gynaecologist at the Department of Obstetrics & Gynaecology, VU University Medical Center, Amsterdam, the Netherlands

**Dr. Dornan** is professor of Medical and Interprofessional Education, Centre for Medical Education, Whitla Medical Building, Queen's University Belfast, Northern Ireland and Emeritus Professor, Maastricht University, PO Box 616, 6200 MD Maastricht, the Netherlands

**Dr. Lingard** is professor of Medicine, senior scientist and director Centre for Education Research & Innovation, Schulich School of Medicine & Dentistry, and professor Faculty of Education, Western University, London, Ontario, Canada.

1  
2  
3  
4  
5  
6  
7  
8  
9  
10  
11  
12  
13  
14  
15  
16  
17  
18  
19  
20  
21  
22  
23  
24  
25  
26  
27  
28  
29  
30  
31  
32  
33  
34  
35  
36  
37  
38  
39  
40  
41  
42  
43  
44  
45  
46  
47  
48  
49  
50  
51  
52  
53  
54  
55  
56  
57  
58  
59  
60

*Corresponding author:*

Dr. T. Taylor

Centre for Education Research & Innovation

Health Sciences Addition Room 110

Schulich School of Medicine & Dentistry, Western University

London, Ontario, Canada, N6A 5C1

1-519-661-2111 x 89044

Email: ttaylor2010@meds.uwo.ca

*Disclaimers:* None.

*Sources of Support:* Dr. Lingard's funding as a scientist in the Program of Experimental Medicine (POEM), from the Department of Medicine at Schulich Medicine & Dentistry provided support for this research. A Faculty Support for Research in Education grant from the Schulich School of Medicine & Dentistry also provided support for this research.

*Word count:* 225 (abstract), 2482 (manuscript)

*Number of tables:* 1

*Conflict of Interest declaration:* None of the authors have any conflicts of interest to declare

## Abstract

Principles of Fatigue in Residency Education

Taryn S. Taylor MD, Christopher J. Watling MD PhD, Pim W. Teunissen MD PhD, Tim Dornan MD PhD, and Lorelei Lingard PhD

## Introduction

Fatigue management strategies (FMS) have been proposed in Canada as a viable alternative to the prescriptive resident duty hour restrictions that exist in many other countries. Other risk-adverse industries, such as aviation, transportation and military, have embedded FMS within workplace occupational health and safety programs that identify fatigue as a threat. Without pre-existing models of fatigue management in medical education, it's unclear whether fatigue is similarly conceptualized as hazardous. This study sought to explore how residents understand fatigue in the context of their training environment.

## Methods

We interviewed 21 residents across 6 surgical and non-surgical programs, at one Canadian institution in 2014. Data collection and analysis occurred iteratively, in keeping with constructivist grounded theory methodology, and informed theoretical sampling to sufficiency.

## Results

Four predominant principles of fatigue captured how the social learning environment shaped residents' perceptions of fatigue. These included the conceptualization of fatigue as: (1) inescapable and therefore acceptable, (2) manageable through experience, (3) necessary for future practice and (4) surmountable when required.

1  
2  
3  
4  
5  
6  
7  
8  
9  
10  
11  
12  
13  
14  
15  
16  
17  
18  
19  
20  
21  
22  
23  
24  
25  
26  
27  
28  
29  
30  
31  
32  
33  
34  
35  
36  
37  
38  
39  
40  
41  
42  
43  
44  
45  
46  
47  
48  
49  
50  
51  
52  
53  
54  
55  
56  
57  
58  
59  
60

**Interpretation**

This study elaborates our understanding of how principles of fatigue are constructed and reinforced by the training environment. Whereas fatigue is seen as a collective threat in other industries, our data show that across the principles, fatigue is seen as a personal challenge. FMS approaches that treat fatigue as an occupational threat may ultimately have limited impact on patient safety and resident fatigue.

Confidential

## Introduction

Emerging research has challenged whether resident duty hour restrictions have done more harm than good [1-4]. In Canada, the National Steering Committee on Resident Duty Hours proposed fatigue management strategies (FMS) as a promising alternative to prescriptive “one size-fits-all” resident duty hour restrictions [5, 6]. The final report advocated for new accreditation standards which would require residency programs to “develop, and keep up to date, fatigue risk management plans” [5, 6]. Empirical evidence supports the notion that prolonged sleep deprivation leads to performance impairment [7-10] and FMS would fulfill a need to maintain public accountability in the absence of duty-hour legislation. However, as Pattani and colleagues note, this mandate lacks important details about the design and implementation of FMS [6].

Unlike the explicit policies that limit resident duty hours in other countries, there is no model for FMS in medical education, and research about effectively managing fatigue in residency contexts is scarce. Arora et al found that an educational seminar to improve sleep hygiene practices had minimal impact on residents’ behaviour [11]. Policies of protected sleep time during prolonged duty periods have shown inconsistent results [12, 13]. Additional studies have highlighted how the influence of local training culture can trump duty hour policy [14] and alter perceptions of the impact of sleep deprivation [15]. These varied perceptions and cultural influences have received little attention to date amid discussions of anticipated FMS.

In other industries, such as transportation, aviation and the military, fatigue management strategies benefit from a uniform understanding of fatigue as an occupational threat [16]. The fact that residents and faculty hold varied perceptions about the impact of fatigue on clinical performance, particularly within surgical contexts, suggests that fatigue may

1  
2 not be quite so straightforwardly understood in residency training [15, 17]. Until we know  
3  
4 more about how fatigue is understood in residency training across multiple disciplines, we risk  
5  
6 developing FMS that are irrelevant and fail to address the existing shortcomings of duty hour  
7  
8 restrictions. Thus, this study seeks to explore how residents understand fatigue in the context  
9  
10 of their training environment.  
11  
12  
13  
14  
15

## 16 17 Methods

18  
19 We used a constructivist grounded theory (CGT) approach, which is suitable for  
20  
21 socially situated research questions [18]. We conducted 21 individual, semi-structured  
22  
23 interviews at three hospitals within a single academic training centre with radiology,  
24  
25 psychiatry, critical care, general surgery, pediatrics, internal medicine, and orthopedic surgery  
26  
27 residents. We deliberately sampled across these programs because the nature of residents' on-  
28  
29 call work varied and we wanted to include programs that have had limited representation in  
30  
31 the existing duty hours literature. All participants were routinely scheduled to work 24h call  
32  
33 shifts, as per our inclusion criteria. Recruitment, data collection and analysis took place  
34  
35 between December 2013 and June 2014. In keeping with CGT methodology, we progressed  
36  
37 from convenience to purposive and then theoretical sampling to sufficiency [19]. One co-  
38  
39 investigator (TT - a resident at one of the hospitals) conducted 20/21 interviews. A co-  
40  
41 investigator (LL - a non-clinician scientist) deliberately conducted one interview for the  
42  
43 purposes of rigor [20]. As insider within the research setting, TT followed standard techniques  
44  
45 for attending to her insider role throughout the analytical process [18, 21].  
46  
47  
48  
49  
50  
51  
52

53 Analyzed data included transcripts of the audio-recorded interviews, alongside field  
54  
55 notes and analytical memos written by TT. We followed the iterative process of data collection  
56  
57 and analysis, which is characteristic of CGT [18]. This required revisions of the semi-structured  
58  
59  
60

1  
2  
3 interview guide in response to progressive refinement of the emerging theory. We chose not to  
4  
5 confine the interviews to any specific definition of fatigue (e.g. physiological, cognitive,  
6  
7 emotional, chronic, acute, etc.) to allow for a more inclusive representation of fatigue.  
8

9  
10 Our analysis had three phases. It began with axial coding, followed by constant  
11  
12 comparative analysis, which led to a more conceptual coding framework [18]. Further  
13  
14 refinement of this framework through collaborative analysis amongst co-investigators (TT, LL,  
15  
16 PT, TD, CW) resulted in the final emergent theory. NVivo® qualitative analysis software and  
17  
18 MindNode Pro®, a mind-mapping tool, were used to organize the coding process.  
19  
20

21  
22 We obtained research ethics approval from the institutional research ethics board at  
23  
24 Western University (#102769).  
25  
26

## 27 28 Results

29  
30 Twenty-one participants were sampled from a range of postgraduate years (1-7) and  
31  
32 included 13 male residents, 12 married residents, 6 residents with children and 13 senior-level  
33  
34 residents, as defined by the individual programs.  
35  
36

37  
38 Residents referred to various features of their training environment that informed how  
39  
40 they recognized, discussed, and responded to fatigue in the context of residency training. The  
41  
42 implicit aspects of the learning environment had more to say about fatigue than anything that  
43  
44 was explicitly said. Given the lack of explicit dialogue about fatigue, residents referenced tacit  
45  
46 messaging that remained embedded within role-modeled behaviour, professional identity  
47  
48 constructs, and normative expectations to understand what fatigue in residency was all about.  
49  
50

51  
52 Four “principles of fatigue” captured these socially informed ways in which residents  
53  
54 made sense of fatigue. Fatigue was seen as: (1) inescapable and therefore acceptable, (2)  
55  
56 manageable through experience, (3) necessary for future practice, and (4) surmountable when  
57  
58  
59  
60

1  
2  
3 required. Each principle is described below and illustrated with salient quotations from the  
4  
5 interviews, which are provided in Table 1.  
6

7  
8 According to the principle of fatigue being inescapable and therefore acceptable, it was  
9  
10 so pervasive that it was simply part of the job. Predominantly senior residents endorsed the  
11  
12 notion that fatigue is manageable through experience; they suggested that working while sleep  
13  
14 deprived was a skill to be honed with practice. The principle that fatigue is necessary for future  
15  
16 practice meant that working while fatigued was a valuable rite of passage to prepare for  
17  
18 similar realities after residency. Residents across all sampled programs reinforced the idea that  
19  
20 fatigue is surmountable when required, by suggesting that they could willfully persevere and  
21  
22 continue to function in spite of fatigue.  
23  
24  
25

26  
27 The principle that fatigue is surmountable when required warrants further elaboration  
28  
29 because it was prominent in participants' responses and is relevant to the concept of fatigue  
30  
31 management. For many residents, fatigue was simply another challenge to overcome: "I think  
32  
33 as long as you can stand up and stay awake and physically manage, then you can usually force  
34  
35 your brain to work, even if it is harder to do and you may be more prone to mistakes..." (017)  
36  
37 Surmounting fatigue wasn't always presented as onerous. At times, participants implied that it  
38  
39 was a natural response to workplace demands: "Usually when the volume is high and you  
40  
41 know you have that pressure, it's almost like there's so much adrenaline, that I don't really feel  
42  
43 as fatigued at that point" (010).  
44  
45  
46  
47

48  
49 While most residents agreed that fatigue would not stand in the way of doing what  
50  
51 needed to be done, the principle of surmounting fatigue was not necessarily synonymous with  
52  
53 providing high quality care. One resident reflected on this by saying, "Obviously we say we  
54  
55 think we are doing a good job. But I think, maybe, you are just a little bit slower, less efficient.  
56  
57 You could get things done faster and maybe more safely if people weren't as tired." (015)  
58  
59  
60



1  
2  
3 Various strategies within the workplace environment allowed participants to “push through”  
4  
5 (018) in spite of fatigue. They described “filtering more to critical versus non-critical issues”  
6  
7 (005), relying on “little check boxes” to remember details (017), deciding to “distribute the  
8  
9 workload” (014), and going “into auto pilot” mode (010). Residents frequently spoke about  
10  
11 how fatigue affected their mood and interactions with others: “I think we can all agree that the  
12  
13 more fatigued we are, the more likely we are to have our social skills compromised.” (010) And  
14  
15 yet, strategies for overcoming this interpersonal aspect of fatigue were noticeably absent from  
16  
17 their responses, often because it was not thought to affect patient care or interactions to a  
18  
19 degree that mattered: “I’m probably less articulate on a post-call breaking bad news but at the  
20  
21 same time, I’ll just slow down and it may seem like I’m more empathetic...which is really just  
22  
23 because I’m having a hard time coming up with the words” (007)  
24  
25  
26  
27  
28

29 In keeping with the principle that fatigue is surmountable when required, few residents  
30  
31 directly attributed near misses or medical errors to fatigue. Residents’ comments suggested  
32  
33 that they typically needed to have negative outcomes drawn to their attention before they  
34  
35 would attribute them to fatigue: “Until it was obvious that I was making technical mistakes, I  
36  
37 probably wouldn’t recognize it.”(013) It seemed that fatigue was not a legitimate reason for  
38  
39 making mistakes because it was deemed surmountable: “ You know, being tired might be a  
40  
41 valid excuse to put things off that can wait, but it’s not an acceptable excuse for poor decision  
42  
43 making. At least not in the medical culture, I think.” (006)  
44  
45  
46  
47

48 Some residents pointed to systems-based limitations that implied that surmounting  
49  
50 fatigue was something they felt “forced to do” (008). For instance, one resident commented on  
51  
52 the lack of “resources in place for staff physicians to be able to say, ‘hey I am tired today’ ...our  
53  
54 groups aren’t built that way... your colleagues will have to pick up the slack and you can’t call in  
55  
56 a substitute like you might in another profession.”(003) Thus, residents’ workplace learning  
57  
58  
59  
60

1  
2 environments reinforced the idea that it is both necessary and plausible to “tough it out” (003)  
3  
4 and overcome the effects of fatigue.  
5  
6

7           There were discrepancies across these four principles, where residents either  
8  
9 challenged the prevailing principle or offered a variation. One questioned how the  
10  
11 pervasiveness of fatigue has remained acceptable in medical training: “But at what point do  
12  
13 we become where that is okay? Because in other professions, it is not okay, so pilots or truck  
14  
15 drivers... (018) A few residents disputed the idea that fatigue served a training purpose: “I  
16  
17 don’t believe we need to train people to perform well when we’re tired....” (013) There were a  
18  
19 few, typically extreme, scenarios in which residents described insurmountable fatigue. This  
20  
21 resident recalled a time when his attending physician, as he put it, “pulled the parachute and  
22  
23 left” (020):  
24  
25  
26  
27

28           [My staff] operated all day and then he was on call with me all night and operated and  
29  
30 then the next day he operated all day... I think it was 42 hours straight in the operating  
31  
32 room... He called another staff to help finish the [last] case for him because he couldn’t  
33  
34 go on anymore. He was pooched... (020)  
35  
36  
37

38  
39 By pushing the limits of these socially-accepted principles of fatigue, residents were reinforcing  
40  
41 the existence of these principles while questioning their merit in the training environment.  
42  
43  
44

## 45 46 Interpretation

47  
48           Our study describes 4 principles of fatigue that residents use to make sense of  
49  
50 fatigue within the training environment: fatigue is understood as inescapable, manageable,  
51  
52 necessary and surmountable. These principles are more than individual beliefs; they are  
53  
54 deeply engrained in the local training culture. And they reveal three serious problems, which  
55  
56  
57  
58  
59  
60

1  
2  
3 must be faced before we can ensure the successful design and implementation of FMS in  
4  
5 residency education.  
6  
7

### 8 9 10 Principles or Myths?

11  
12 The first problem is that the principles of fatigue have been discredited as ‘myths’ in  
13  
14 other high performance industries such as aviation and transportation [22]. There are both  
15  
16 regulatory and organizational reasons for why these industries have outgrown the principles  
17  
18 of fatigue that residents in our study subscribe to. At a regulatory level, fatigue was first  
19  
20 legitimized as a safety priority during a Department of Transportation/Federal Highway  
21  
22 Administration Safety Summit twenty years ago [22]. Since then, high profile disasters such as,  
23  
24 “the Chernobyl nuclear reactor meltdown, the Exxon Valdez catastrophe, the Three Mile Island  
25  
26 nuclear power station accident...” have clearly implicated fatigue as a “causal or contributory  
27  
28 factor” [23]. Therefore, organizations that fail to implement sufficient fatigue management  
29  
30 systems are liable to be found “criminally negligent in the event of an on-the-job mishap”[22].  
31  
32 Public visibility may be one distinguishing feature that has prompted other industries to adopt  
33  
34 the stance that fatigue is an occupational safety threat, which in turn supports an explicit and  
35  
36 formalized approach to fatigue management. By contrast, the consequences of fatigued  
37  
38 residents, are generally less public with fewer casualties per fatigue-related incident, enabling  
39  
40 continued skepticism in medical education about whether fatigue is dangerous in residency  
41  
42 training [24].  
43  
44  
45  
46  
47  
48  
49

### 50 51 52 Challenge or Threat?

53  
54  
55 The second problem is that the principles revealed in our study characterize fatigue not  
56  
57 as a threat, but as a challenge. Previous research has shown that surgical residents believe  
58  
59  
60

1  
2 themselves to be resilient to the effects of sleep deprivation [15] and that general surgery  
3 residents and faculty believe fatigue is irrelevant to patient care [17]. Our research suggests  
4  
5 that this belief may permeate residency more broadly. Even residents who perceived that their  
6  
7 performance was negatively affected by fatigue, nevertheless believed there had been no  
8  
9 meaningful impact on patient care. In addition to not seeing fatigue as a threat, our  
10  
11 participants perceived it as a challenge: the ability to keep working while fatigue was  
12  
13 presented as a necessary skill. One implication of this is that the responsibility for this skill lies  
14  
15 primarily with the resident. This is in stark contrast to other industries, such as transportation  
16  
17 and aviation [25], that approach fatigue as a collective threat, not as a personal challenge.  
18  
19  
20  
21  
22  
23  
24  
25  
26

### 27 Persevere or ... ?

28  
29 The third problem is that residents cannot be expected to view fatigue as a threat when  
30  
31 the working environment presents no acceptable alternative to working fatigued. Residents  
32  
33 noted that there weren't any explicit provisions for addressing fatigue in the workplace,  
34  
35 although there were established conventions for dealing with overwhelming patient volume,  
36  
37 clinical uncertainty or procedural supervision. Studies of residency as a workplace training  
38  
39 environment have shown that the workplace can implicitly preserve the status quo [26]. As our  
40  
41 data demonstrated, the unspoken message from the training environment was that fatigue  
42  
43 must be surmountable, because it could not be helped.  
44  
45  
46  
47  
48  
49  
50

### 51 Limitations

52  
53 We conducted this research using a constructivist grounded theory methodology. This  
54  
55 methodology is not intended to create a generalizable theory but, rather, to offer in-depth  
56  
57 insight into a social phenomenon within a given context. We performed this research at a  
58  
59  
60

1  
2  
3 single centre and so we cannot explicate the local training culture from our results. Further  
4  
5 research that explores our emergent theory in other contexts is needed. We relied on  
6  
7 individual residents' account of experiencing fatigue rather than an objective measurement of  
8  
9 fatigue because this was most salient to our research question. Consequently, this study does  
10  
11 not quantify the prevalence of fatigue or attempt to measure its impact on patient care. We  
12  
13 benefitted from having an insider (TT) who could provide analytical insights that were  
14  
15 accessible to someone with lived experience [21] as part of the research team. To remain  
16  
17 reflexively aware of how her insider experience informed the analysis, she made regular  
18  
19 memos and co-analyzed with non-insider members of the research team [18].  
20  
21  
22  
23  
24  
25  
26

### 27 Implications

28  
29 The success of FMS in other industries is based on the assumption that fatigue is  
30  
31 uniformly understood as an occupational threat. Our results suggest that this assumption does  
32  
33 not hold in residency. Under present conditions, the implementation of FMS in residency  
34  
35 training is unlikely to have a significant impact on fatigue or patient safety.  
36  
37  
38  
39  
40  
41  
42  
43  
44  
45  
46  
47  
48  
49  
50  
51  
52  
53  
54  
55  
56  
57  
58  
59  
60

## References

1. Carpenter RO, Spooner J, Arbogast PG, Tarpley JL, Griffin MR, Lomis KD. Work hours restrictions as an ethical dilemma for residents: A descriptive survey of violation types and frequency. *Current surgery*. 2006;63(6):448-55.
2. Sen S, Kranzler HR, Didwania AK, Schwartz AC, Amarnath S, Kolars JC, et al. Effects of the 2011 duty hour reforms on interns and their patients: a prospective longitudinal cohort study. *JAMA internal medicine*. 2013;173(8):657-62.
3. Desai SV, Feldman L, Brown L, Dezube R, Yeh HC, Punjabi N, et al. Effect of the 2011 vs 2003 duty hour regulation-compliant models on sleep duration, trainee education, and continuity of patient care among internal medicine house staff: a randomized trial. *JAMA Intern Med*. 2013;173(8):649-55.
4. Parshuram CS, Amaral AC, Ferguson ND, Baker GR, Etchells EE, Flintoft V, et al. Patient safety, resident well-being and continuity of care with different resident duty schedules in the intensive care unit: a randomized trial. *CMAJ*. 2015;187(5):321-9.
5. National Steering Committee on Resident Duty Hours. *Fatigue, Risk and Excellence: Towards a Pan-Canadian Consensus on Resident Duty Hours*. Ottawa, Ontario: The Royal College of Physicians and Surgeons of Canada; 2013. p. 1-52.
6. Pattani R, Wu PE, Dhalla IA. Resident duty hours in Canada: past, present and future. *Canadian Medical Association Journal*. 2014;186(10):761-5.
7. Arnedt JT, Owens J, Crouch M, Stahl J, Carskadon MA. Neurobehavioural performance of residents after heavy night call vs after alcohol ingestion. *JAMA*. 2005;294(9):1025-33.
8. Ayas NT, Barger LK, Cade BE, Hashimoto DM, Rosner B, Cronin JW, et al. Extended work duration and the risk of self-reported percutaneous injuries in interns. *JAMA*. 2006;296(9):1055-62.

- 1  
2  
3 9. Van Dongen HPA, Maislin G, Mullington JM, Dinges DF. The cumulative cost of additional  
4  
5 wakefulness: Dose-response effects on neurobehavioral functions and sleep physiology from  
6  
7 chronic sleep restriction and total sleep deprivation. *Sleep*. 2003;26(2):117-26.  
8
- 9  
10 10. Sugden C, Housden CR, Aggarwal R, Sahakian BJ, Darzi A. Effect of pharmacological  
11  
12 enhancement on the cognitive and clinical psychomotor performance of sleep-deprived  
13  
14 doctors: a randomized controlled trial. *Annals of surgery*. 2012;255(2):222-7.  
15
- 16  
17 11. Arora VM, Georgitis E, Woodruff JN, Humphrey HJ, Meltzer D. Improving sleep hygiene  
18  
19 of medical interns: Can the sleep, alertness, and fatigue education in residency program help?  
20  
21 *Archives of Internal Medicine*. 2007;167(16):1738-44.  
22
- 23  
24 12. Arora V, Dunphy C, Chang VY, Ahmad F, Humphrey HJ, Meltzer D. The effects of on-duty  
25  
26 napping on intern sleep time and fatigue. *Annals of Internal Medicine*. 2006;144(11):792-8.  
27
- 28  
29 13. Richardson GS, Wyatt JK, Sullivan JP, Orav EJ, Ward AE, Wolf MA, et al. Objective  
30  
31 assessment of sleep and alertness in medical house staff and the impact of protected time for  
32  
33 sleep. *Sleep*. 1996;19(9):718-26.  
34
- 35  
36 14. Taylor TS, Nisker J, Lingard L. To stay or not to stay? A grounded theory study of  
37  
38 residents' postcall behaviors and their rationalizations for those behaviors. *Academic*  
39  
40 *medicine*. 2013;88(10):1529-33.  
41
- 42  
43 15. Woodrow SI, Park J, Murray BJ, Wang C, Bernstein M, Reznick RK, et al. Differences in  
44  
45 the perceived impact of sleep deprivation among surgical and non-surgical residents. *Medical*  
46  
47 *education*. 2008;42(5):459-67.  
48
- 49  
50 16. Dawson D, Chapman J, Thomas MJ. Fatigue-proofing: a new approach to reducing  
51  
52 fatigue-related risk using the principles of error management. *Sleep Med Rev*. 2012;16(2):167-  
53  
54 75.  
55  
56  
57  
58  
59  
60

- 1  
2  
3 17. Coverdill JE, Bittner JG, Park MA, Pipkin WL, Mellinger JD. Fatigue as impairment or  
4 educational necessity? Insights into surgical culture. *Acad Med*. 2011;86(10 Suppl):S69-72.
- 5  
6  
7 18. Charmaz K. *Constructing Grounded Theory: A practical guide through qualitative*  
8  
9 analysis. Los Angeles: Sage Publications; 2006.
- 10  
11  
12 19. Morse JM. The Significance of Saturation. *Qualitative Health Research*. 1995;5(2):147-9.
- 13  
14  
15 20. Thurmond VA. The point of triangulation. *Journal of nursing scholarship*.  
16  
17 2001;33(3):253-8.
- 18  
19  
20 21. Corbin Dwyer S, Buckle JL. The Space Between: On Being an Insider-Outsider in  
21  
22 Qualitative Research. *International Journal of Qualitative Methods*. 2009;8(1):54-63.
- 23  
24  
25 22. Caldwell JA, Caldwell JL. *Fatigue in Aviation: A Guide to Staying Awake at the Stick*.  
26  
27 Burlington, VT: Ashgate Publishing Company; 2003. 157 p.
- 28  
29  
30 23. Col. Watt CG. *Aircrew Fatigue Management*. Montgomery, AL: Air War College, Maxwell  
31  
32 Airforce Base, 2009.
- 33  
34  
35 24. Osborne R, Parshuram CS. Delinking resident duty hours from patient safety. *BMC Med*  
36  
37 *Educ*. 2014;14 Suppl 1:S2.
- 38  
39  
40 25. Dawson D. Fatigue research in 2011: from the bench to practice. *Accident; analysis and*  
41  
42 prevention. 2012;45 Suppl:1-5.
- 43  
44  
45 26. Teunissen PW. Experience, trajectories, and reifications: an emerging framework of  
46  
47 practice-based learning in healthcare workplaces. *Adv Health Sci Educ Theory Pract*. 2014.
- 48  
49  
50  
51  
52  
53  
54  
55  
56  
57  
58  
59  
60



**Table 1. Four Principles of Fatigue**

| <b>Principle</b>                                | <b>Quotation (Anonymous Resident #)</b>                                                                                                                                                                                                                                                                                                                                                                                                                                                                                                                                                                                                                                    |
|-------------------------------------------------|----------------------------------------------------------------------------------------------------------------------------------------------------------------------------------------------------------------------------------------------------------------------------------------------------------------------------------------------------------------------------------------------------------------------------------------------------------------------------------------------------------------------------------------------------------------------------------------------------------------------------------------------------------------------------|
| Fatigue is inescapable and therefore acceptable | <p>...I think it's kind of expected. Everyone knows you're going to be tired (012)</p> <p>I don't think, culturally, talking about being tired is really appropriate in my program. We accept it... (013)</p>                                                                                                                                                                                                                                                                                                                                                                                                                                                              |
| Fatigue is manageable through experience        | <p>You just can't stand up anymore. You can't keep your eyes open anymore. You feel like you are going to pass out or whatever. A lot of people have those sensations after staying up for 24 hours. We learn to manage that. (017)</p> <p>It's when you're really pulling through the full 24-hours that it gets challenging. Everyone is like, 'you just need to build stamina.' I say, you just need to rethink how you redistribute your manpower in order to make it realistic (008)</p>                                                                                                                                                                              |
| Fatigue is necessary for future practice        | <p>I'm hoping when I'm a consultant I'll be more rested when I'm postcall, because there will be residents hopefully, doing more patient care and the difficult decisions are basically being filtered through the residents...(006)</p> <p>... in times of crisis, you need to still be able to make decisions and not freeze and be like, oh, I'm tired. I have to go to bed. I think that is what part of this training is...we all learn to manage this in some way, I think. We all learn. (005)</p>                                                                                                                                                                  |
| Fatigue is surmountable when required           | <p>I think recognizing that you are tired but then, also recognizing that there is a job to be done. You are looking after patients. And so someone is there for your services...So, you just get to a point where ... you are just able to put your own needs secondary. 'hey I'm tired. I'm not thinking quite the same and all of those things. But I have a job to do here.' (018)</p> <p>Recently, as a senior resident you don't have as many nights where you are up all night but you have way more longer stretches where you are going three or four hours a night every night for 7 or 8 days. And you are amazed at the levels you can push yourself (019)</p> |
